# Transient Receptor Potential Ankyrin 1 as a Target for Perioperative Pain Management

**P**ERIOPERATIVE pain remains a clinical challenge. The underlying mechanisms of this pain are incompletely characterized, but likely include both peripheral and central sensitization, driven by inflammation, nerve injury, and ischemia. The current armamentarium for perioperative pain includes opioids, nonsteroidal antiinflammatory drugs, and local anesthetics. Many of the emerging drugs aimed at reducing this pain represent reformulations of tried-and-true mechanisms (e.g., intravenous acetaminophen) but fail to provide clinicians truly new approaches to the issue. Wei *et al.*'s "Transient receptor potential ankyrin 1 ion channel contributes to guarding pain and mechanical hypersensitivity in a rat model of postoperative pain" suggests that TRPA1 antagonists could provide a new mechanism to reduce perioperative pain.<sup>1</sup>

TRPA1 is a nonselective cation channel of the transient receptor potential superfamily. Gain-of-function mutations in humans lead to familial episodic pain syndrome, a disorder characterized by debilitating bouts of pain often triggered by cold, fatigue, or lack of food.<sup>2</sup> It is highly expressed by both sensory nerve endings and their cell bodies residing in the dorsal root, nodose, trigeminal, and jugular ganglia. As such, activation of TRPA1 leads to firing of peripheral nociceptors whose projections terminate in the superficial lamina of the dorsal horn.<sup>3</sup>

The activation mechanism of TRPA1 is unique. More than 10 cysteine residues in the ankyrin domains typify the N-terminus of TRPA1. These cysteine residues are subject to covalent modification by reactive chemicals. The best-characterized activator of TRPA1 is allyl isothiocyanate, commonly known as mustard oil, which underlies the pungency of horseradish and wasabi. As our understanding of the channel increases, an expanding array of activators emerges.<sup>4</sup> These include exogenous chemicals such as formaldehyde and acrolein (a key aldehyde in cigarette smoke), but also

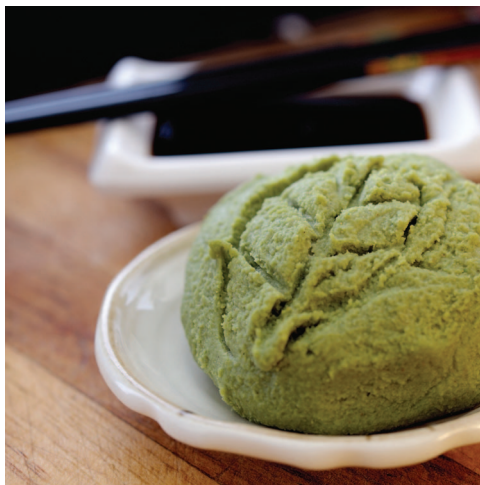

***“Given the multiple pain mechanisms involved in perioperative pain, TRPA1 antagonists present a compelling profile for clinical testing.”***

drugs such as the volatile anesthetics isoflurane and desflurane, the intravenous anesthetics propofol and etomidate,<sup>5</sup> as well as lidocaine.<sup>6</sup> This ability to activate TRPA1 may account for some of the airway irritation and burning pain upon administration of these compounds. TRPA1 antagonists may prevent pain associated with anesthetic injection as well as desflurane-induced bronchospasm.

In addition to synthetic activators, a variety of endogenously produced chemicals also stimulate TRPA1 currents. These include reactive prostaglandins, products of liposome peroxidation such as 4-hydroxynonenal, and reactive oxygen/nitrogen species.<sup>3,4</sup> Because such molecules are often increased in inflammatory, neuropathic, and ischemic pain states, one could assume that TRPA1 activators are present in the postsurgical milieu.

To test for a potential role of TRPA1 in the Brennan model of incisional pain, Pertovaara *et al.* turned to selective TRPA1 antagonists. Briefly, the group made a 1-cm longitudinal incision in the intraplantar surface of the skin, underlying fascia, and muscle. 24–48 h after surgery they assessed spontaneous pain behaviors, measured by guarding score and mechanical hypersensitivity to calibrated monofilaments. The team found that two structurally unrelated antagonists, Chembridge-5861528 (a close structural analog of HC-030031) and A-967079, attenuated both the duration of guarding behaviors and the mechanical hypersensitivity observed when administered intraperitoneally. This suggests that TRPA1 activity contributes to acute incisional pain. Importantly, the effects of Chembridge-5861528 were observed in the absence of detectable locomotor effects in an open-field test, considered a measure of undesirable sedative side effects.

Because both peripheral and central mechanisms contribute to postsurgical pain, the authors sought to determine the site of action of the TRPA1 antagonists. They found that

Photo: ©Thinkstock.

Accepted for publication March 15, 2012. Dr. Moran has options in Hydra Biosciences, Cambridge, Massachusetts; the company has a TRPA1 antagonist drug discovery program in collaboration with Cubist Pharmaceuticals in Lexington, Massachusetts.

Copyright © 2012, the American Society of Anesthesiologists, Inc. Lippincott Williams & Wilkins. *Anesthesiology* 2012; 117:8–9

◆ This Editorial View accompanies the following article: Wei H, Karimaa M, Korjamo T, Koivisto A, Pertovaara A: Transient receptor potential ankyrin 1 ion channel contributes to guarding pain and mechanical hypersensitivity in a rat model of postoperative pain. *ANESTHESIOLOGY* 2012; 117:137–48.

local injection of the antagonists into the ipsilateral, but not contralateral, paw was sufficient to reduce spontaneous pain behaviors, indicating that activation of TRPA1 in peripheral nociceptors likely contributes to this pain. In contrast, intrathecal delivery of the TRPA1 antagonists exerted no significant effect on guarding behaviors, suggesting that spinal TRPA1 does not play a major role in spontaneous pain behaviors.

In addition to its effects on guarding behaviors, systemic delivery of TRPA1 antagonists also reduced pain evoked by mechanical stimulation. However, in contrast to what was observed in guarding pain, both intraplantar and intrathecal administration of TRPA1 antagonists reduced mechanical hypersensitivity after incision, reinforcing the idea that different pain mechanisms contribute to different aspects of incisional pain in the rat. Intrathecal delivery seemed to exert relatively more effect on mechanical allodynia whereas local delivery appeared more effective against mechanical hyperalgesia. Neither systemic nor intraplantar delivery of a TRPA1 antagonist affected mechanical sensitivity in an intact, uninjured paw, indicating some specificity of the TRPA1 mechanism for the injured state.

Although the role of TRPA1 on the distal ends of nociceptors has been the subject of substantial study, the function of TRPA1 in the spinal cord remains underexplored. These results suggest that endogenous activators of TRPA1 are increased in the spinal cord after incision and that activation of TRPA1 contributes to maintenance of mechanical hypersensitivity. These data echo previous findings in inflammatory pain with transient receptor potential vanilloid 1 (TRPV1), a related ion channel with a similar expression pattern. Systemic delivery of a TRPV1 antagonist reduced both thermal hyperalgesia and mechanical allodynia. Although local delivery of the compound was sufficient to reduce the heat hyperalgesia, the effect on mechanical allodynia required central penetration.<sup>7</sup> More recent data suggest that reducing TRPV1 activity also reduced neuropeptide levels and spinal glutamate release.<sup>8</sup> Additional work will be required to determine the mechanism by which TRPA1 is involved in spinal cord pain processing.

The work presented here complements multiple other studies that implicate TRPA1 in pain. Human gain-of-function mutations in TRPA1 lead to a congenital pain disorder termed familial episodic pain syndrome, indicating that TRPA1 overactivity is sufficient to cause pain.<sup>2</sup> TRPA1 antagonists are efficacious in multiple other rodent pain models including those thought to represent inflammatory pain, neuropathic pain, visceral pain, and chemically evoked pain.<sup>3,9</sup> They are also efficacious in multiple rodent models of anesthetic-induced pain.<sup>5,6</sup> Given the multiple pain mechanisms involved in perioperative pain, TRPA1 antagonists present a compelling profile for clinical testing. Because TRPA1 expression appears low outside of sensory neurons, there is significant optimism that selective TRPA1 antagonist will have a good safety profile. Preclinical experiments in

rodents suggest that the thermoregulation issues that plagued TRPV1 antagonists may not accompany block of TRPA1.<sup>10</sup> Whether blocking TRPA1 in sensory neurons that innervate the organs such as the lung and intestine will produce undesired side effects such as changes in gastrointestinal mobility or cough reflexes remains to be seen. Results of these tests should be available in the coming years, because two groups have announced that their TRPA1 antagonists have entered phase I clinical trials. It is only with human data that we will be able to truly assess the value of TRPA1 as an analgesic target.

**Magdalene M. Moran, Ph.D.,** Department of Biology, Hydra Biosciences, Cambridge, Massachusetts. mmoran@hydrabiosciences.com

## References

1. Wei H, Karimaa M, Korjamo T, Koivisto A, Pertovaara A: Transient receptor potential ankyrin 1 ion channel contributes to guarding pain and mechanical hypersensitivity in a rat model of postoperative pain. *ANESTHESIOLOGY* 2012; 117: 137–48
2. Kremeyer B, Lopera F, Cox JJ, Momin A, Rugiero F, Marsh S, Woods CG, Jones NG, Paterson KJ, Fricker FR, Villegas A, Acosta N, Pineda-Trujillo NG, Ramirez JD, Zea J, Burley MW, Bedoya G, Bennett DL, Wood JN, Ruiz-Linares A: A gain-of-function mutation in TRPA1 causes familial episodic pain syndrome. *Neuron* 2010; 66:671–80
3. Moran MM, McAlexander MA, Biró T, Szallasi A: Transient receptor potential channels as therapeutic targets. *Nat Rev Drug Discov* 2011; 10:601–20
4. Bessac BF, Jordt SE: Breathtaking TRP channels: TRPA1 and TRPV1 in airway chemosensation and reflex control. *Physiology (Bethesda)* 2008; 23:360–70
5. Matta JA, Cornett PM, Miyares RL, Abe K, Sahibzada N, Ahern GP: General anesthetics activate a nociceptive ion channel to enhance pain and inflammation. *Proc Natl Acad Sci U S A* 2008; 105:8784–9
6. Leffler A, Lattrell A, Kronewald S, Niedermirtl F, Nau C: Activation of TRPA1 by membrane permeable local anesthetics. *Mol Pain* 2011; 7:62
7. Cui M, Honore P, Zhong C, Gauvin D, Mikusa J, Hernandez G, Chandran P, Gomtsyan A, Brown B, Bayburt EK, Marsh K, Bianchi B, McDonald H, Niforatos W, Neelands TR, Moreland RB, Decker MW, Lee CH, Sullivan JP, Faltynek CR: TRPV1 receptors in the CNS play a key role in broad-spectrum analgesia of TRPV1 antagonists. *J Neurosci* 2006; 26:9385–93
8. Puttfarcken PS, Han P, Joshi SK, Neelands TR, Gauvin DM, Baker SJ, Lewis LG, Bianchi BR, Mikusa JP, Koenig JR, Perner RJ, Kort ME, Honore P, Faltynek CR, Kym PR, Reilly RM: A-995662 [(R)-8-(4-methyl-5-(4-(trifluoromethyl)phenyl)oxazol-2-ylamino)-1,2,3,4-tetrahydronaphthalen-2-ol], a novel, selective TRPV1 receptor antagonist, reduces spinal release of glutamate and CGRP in a rat knee joint pain model. *Pain* 2010; 150:319–26
9. Engel MA, Leffler A, Niedermirtl F, Babes A, Zimmermann K, Filipović MR, Izydorczyk I, Eberhardt M, Kichko TI, Mueller-Tribbensee SM, Khalil M, Siklosi N, Nau C, Ivanović-Burmazović I, Neuhuber WL, Becker C, Neurath MF, Reeh PW: TRPA1 and substance P mediate colitis in mice. *Gastroenterology* 2011; 141:1346–58
10. Chen J, Joshi SK, DiDomenico S, Perner RJ, Mikusa JP, Gauvin DM, Segreti JA, Han P, Zhang XF, Niforatos W, Bianchi BR, Baker SJ, Zhong C, Simler GH, McDonald HA, Schmidt RG, McGaraughty SP, Chu KL, Faltynek CR, Kort ME, Reilly RM, Kym PR: Selective blockade of TRPA1 channel attenuates pathological pain without altering noxious cold sensation or body temperature regulation. *Pain* 2011; 152:1165–72
